# Supplementary material for: High-performance flexible supercapacitors based on mesoporous carbon nanofibers/Co3O4/MnO2 hybrid electrodes
Source: Royal Society of Chemistry journal article supplement (doi:10.1039/c4ra17312k), 2015-01-01
Supplement: c4ra17312k1.pdf [file c4ra17312k1.pdf]

# **High-performance flexible supercapacitors based on mesoporous carbon nanofibers/Co<sub>3</sub>O<sub>4</sub>/MnO<sub>2</sub> hybrid electrodes**

**Yunpeng Huang <sup>a</sup>, Yue-E Miao <sup>a</sup>, Weng Weei Tjiu <sup>b</sup>, Tianxi Liu <sup>a\*</sup>**

*<sup>a</sup> State Key Laboratory of Molecular Engineering of Polymers, Department of Macromolecular Science, Fudan University, Shanghai, 200433, P. R. China*

*<sup>b</sup> Institute of Materials Research and Engineering, A\*STAR (Agency for Science, Technology and Research), 3 Research Link, Singapore 117602, Singapore*

*\* To whom correspondence should be addressed. E-mail: [txliu@fudan.edu.cn](mailto:txliu@fudan.edu.cn); Tel:*

*+86-21-55664197; Fax: +86-21-65640293.*

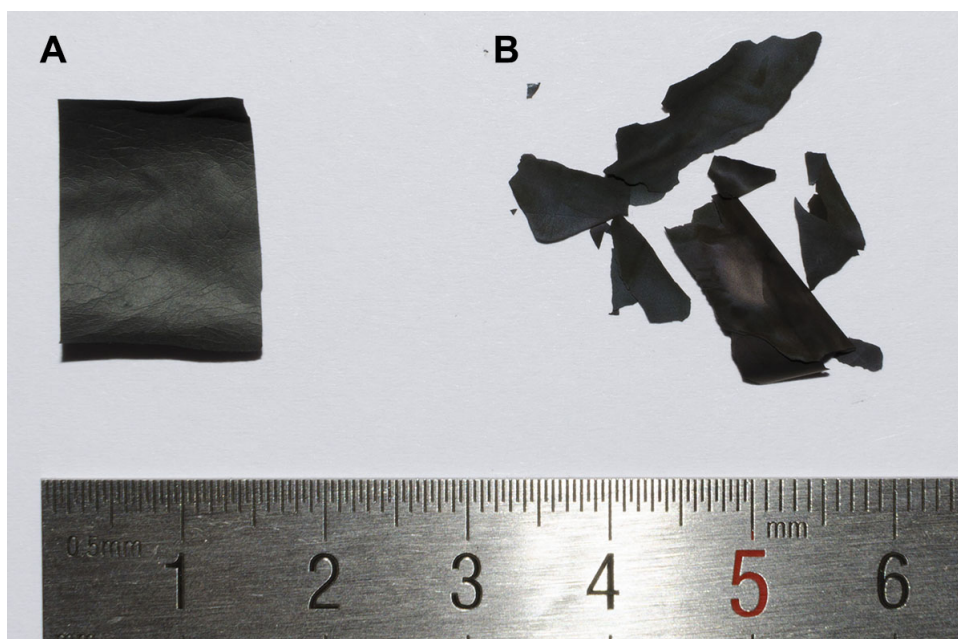

**Figure S1.** Digital photographs of CNFs/Co<sub>3</sub>O<sub>4</sub> membranes derived from (A) 1 wt % Co(Ac)<sub>2</sub> and (B) 3 wt % Co(Ac)<sub>2</sub>.

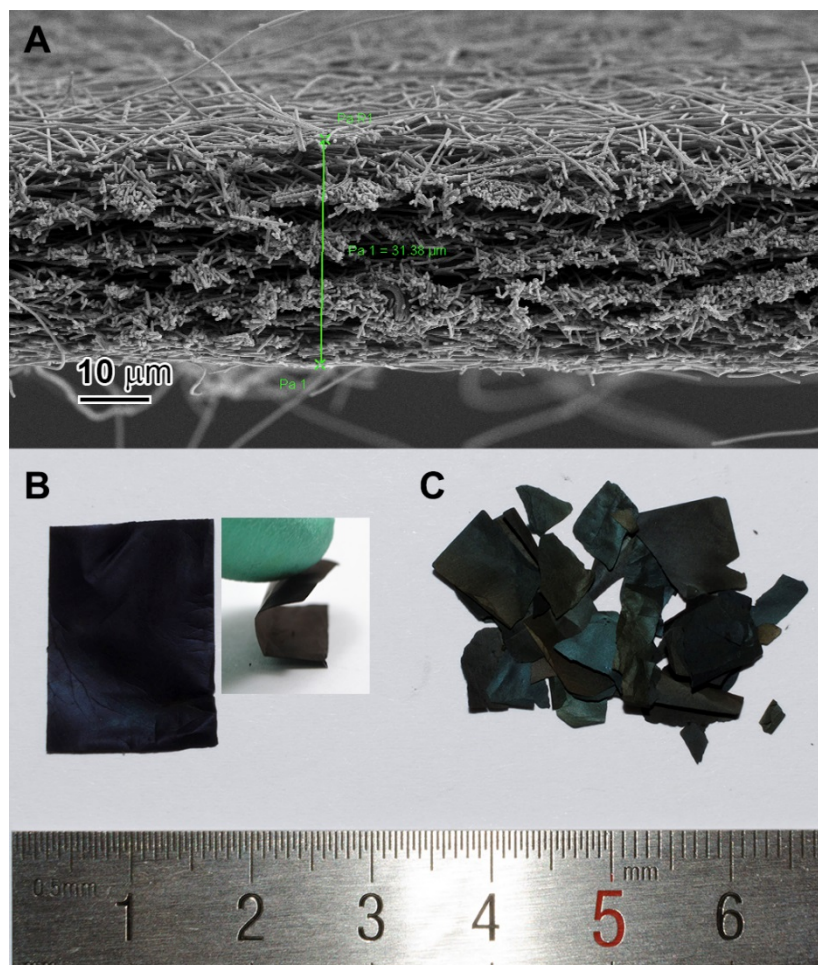

**Figure S2.** (A) Cross-sectional image of CNFs/Co<sub>3</sub>O<sub>4</sub> membranes derived from 1 wt % Co(Ac)<sub>2</sub>, (B) CCM-10 membrane and (C) CCM-20 membrane.

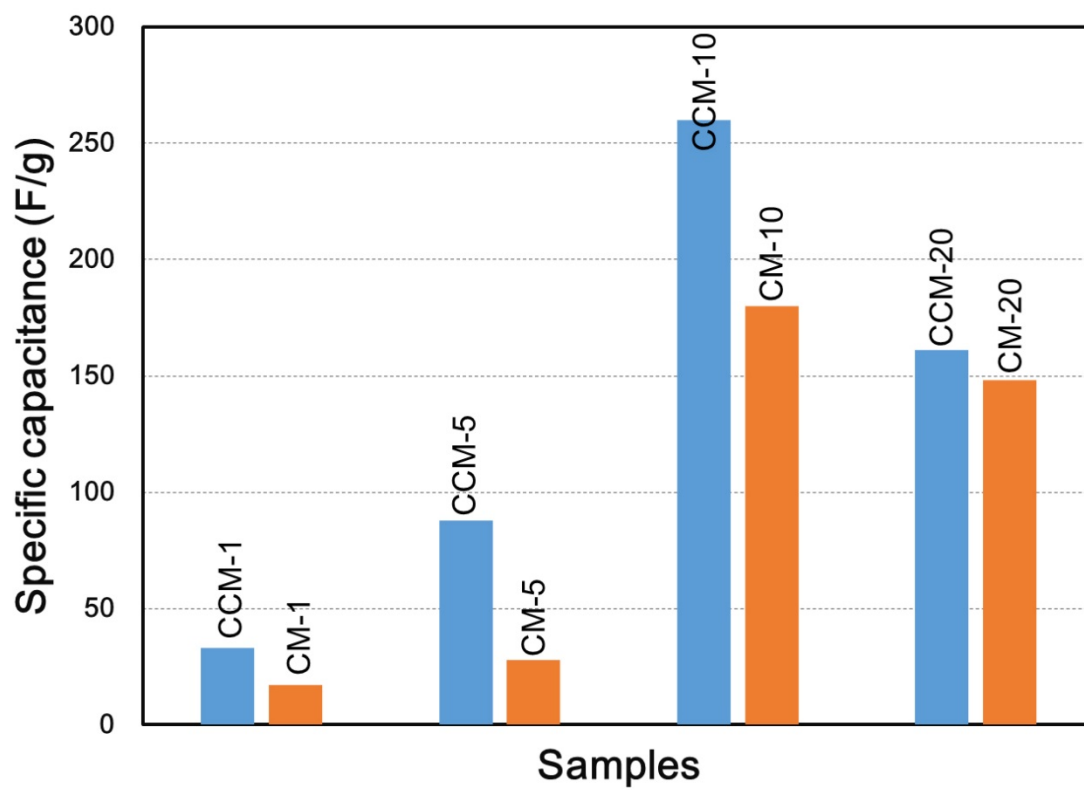

**Figure S3.** Comparison of the total capacitance between CCMs and CMs.

### Calculation of MnO<sub>2</sub> loading content from TGA data:

In the CNFs/Co<sub>3</sub>O<sub>4</sub>/MnO<sub>2</sub> composite, we set MnO<sub>2</sub> weight as M, carbon weight as C, and percentage of residue as n (%), respectively.

Then, the weight of consumed carbon can be expressed as  $\frac{36 \times M}{347.6}$  according to Eq. (1), and thus Co<sub>3</sub>O<sub>4</sub> mass in all composites can be given by  $\left(\frac{36 \times M}{347.6} + C\right) \times 0.082$ , and mass of residual Mn<sub>2</sub>O<sub>3</sub> is  $\frac{157.8 \times M}{173.8}$ . Then, the following equation can be derived from the TGA curves:

$$\left(\left(\frac{36 \times M}{347.6} + C\right) \times 0.082 + C + M\right) \times n = \left(\frac{36 \times M}{347.6} + C\right) \times 0.082 + \frac{157.8 \times M}{173.8}$$

Thus, the loading percentage of MnO<sub>2</sub> is  $\frac{M}{\left(\frac{36 \times M}{347.6} + C\right) \times 0.082 + C + M}$ . All results are listed in Table S1:

**Table S1.** Mass loading of MnO<sub>2</sub> for all the samples.

| Sample                              | Residue mass (%)                              | Calculated MnO <sub>2</sub> content (%) |
|-------------------------------------|-----------------------------------------------|-----------------------------------------|
| CCM-1                               | 13.91                                         | 7.54                                    |
| CCM-5                               | 29.78                                         | 26.42                                   |
| CCM-10                              | 43.71                                         | 43.00                                   |
| CCM-20                              | 60.80                                         | 63.33                                   |
| CNFs/Co <sub>3</sub> O <sub>4</sub> | Co <sub>3</sub> O <sub>4</sub> content: 8.21% |                                         |

### Specific capacitance calculation:

The specific capacitance of the composite electrode based on the mass of MnO<sub>2</sub> is calculated according to the following equation:<sup>1</sup>

$$C_{\text{MnO}_2} = \frac{m_{\text{fiber}}}{m_{\text{MnO}_2}} \left\{ C_{\text{comp}} \left( 1 + \frac{m_{\text{MnO}_2}}{m_{\text{fiber}}} \right) - C_{\text{fiber}} \right\}$$

where  $C_{\text{MnO}_2}$  is the specific capacitance from the  $\text{MnO}_2$  layer alone,  $C_{\text{comp}}$  is total capacitance of all the components in the composite,  $C_{\text{fiber}}$  is the capacitance from the CNFs/ $\text{Co}_3\text{O}_4$  fiber only.  $m_{\text{fiber}}$  and  $m_{\text{MnO}_2}$  are the mass of CNFs/ $\text{Co}_3\text{O}_4$  hybrid fiber and deposited  $\text{MnO}_2$  in the composite obtained from TGA curves.

$C_{\text{comp}}$  and  $C_{\text{fiber}}$  can be calculated from CV according to the following equation:

$$C = \frac{\int i d\Delta u}{v \Delta u m}$$

where  $i$  is the discharging current (A),  $\Delta u$  is the discharge voltage range (V),  $v$  is scan rate ( $\text{mV s}^{-1}$ ), and  $m$  is the mass of electrode materials.

### Reference:

- 1 A. Ghosh, E. J. Ra, M. H. Jin, H. Jeong, T. H. Kim, C. Biswas and Y. H. Lee, *Adv. Funct. Mater.*, 2011, **21**, 2541-2547.
